# Supplementary material for: Electronic Impacts on the Solvent-Free Mechanochemical Synthesis of Salophen Ligands in Ball Mill
Source: Hindawi journal article supplement (doi:10.1155/2022/1418032), 2022-10-03
Supplement: f1 [file 1418032.f1.docx]

**Electronic impacts on the solvent-free mechanochemical synthesis of Salophen ligands in ball mill**

**Getinet Tamiru Tigineh**

*Department of Chemistry, Bahir Dar University, Peda Street 07, PO Box 79, Bahir Dar, Amhara, Ethiopia.*

*Corresponding author: [getsh2007@gmail.com](mailto:2getsh2007@gmail.com); [Getenet.Tamiru@bdu.edu.et](mailto:Getenet.Tamiru@bdu.edu.et) ;

ORCID: 0000-0002-1819-7222

**Supporting Information**

**Table of contents**

I. General remarks………………………………………………………………………………S2

II. Reaction monitoring using 1H NMR spectrometry…………………………………………..S8

III. NMR solvent effect ……………………………………………………………………......S12

IV. Appendix – Structure Characterization Data - 1H NMR, 13C NMR, FT-IR, and High-Resolution Mass of compounds obtained in this Study………………………………………. S13

**I. General remarks**

**Experimental Section**

All chemicals were purchased from Sigma-Aldrich, TCI, and Alfa Aesar and were used without

further purification. A Retsch Mixer Mill MM400 was used for ball milling experiments. 1H nuclear magnetic resonance spectroscopy (NMR) spectra were obtained on a 400 MHz Bruker Avance III HD Fourier transform NMR spectrometer and referenced to the residual protonated solvent. 13C NMR spectra were recorded on a 100 MHz Bruker Avance III HD Fourier transform NMR spectrometer and were fully decoupled by broadband decoupling. High-resolution mass spectra (HRMS) were obtained using a high-resolution quadrupole time-of-flight mass spectrometer (ion mode: EI+). Infrared spectra were recorded on an ABB MB3000 Fourier-transform infrared (FT-IR) spectrometer equipped with an attenuated total reflectance module.

**General Procedure**

A 10 mL Teflon container was filled with compound **1** (2 mmol) and compound **2** (1 mmol) and one stainless-steel ball (10 mm diameter). After running the mixer mill at 30 Hz for 60 min. The crude product was collected washed by hexane and dried in vacuo at RT to afford the desired product **3**. The product distribution was monitored by 1H NMR and FT-IR spectroscopy.

NOTE:

- Because of the sticky nature of the substance, **3a** and **7** found them difficult to isolate pure product from hexane.
- Salophen ligand **3g** was purified by hexane followed by water

**6,6'-((1E,1'E)-(1,2-phenylenebis(azanylylidene))bis(methanylylidene))bis(2-ethoxyphenol) (3a)**

Color: Orange (91%, Sticky solid); **1H NMR** (400 MHz, CDCl3) δ 13.05 (s, 2H), 8.55 (d, J = 11.2 Hz, 2H), 7.28 – 7.21 (m, 2H), 7.14 – 7.08 (m, 2H), 6.92 (dd, J = 14.3, 6.6 Hz, 4H), 6.76 (t, J = 7.9 Hz, 2H), 4.08 – 4.02 (m, 4H), 1.41 – 1.35 (m, 6H); **13C NMR** (101 MHz, CDCl3) δ 164.38, 151.97, 147.75, 142.55, 127.53, 124.18, 120.44, 119.42, 118.47, 117.09, 64.85, 14.88; **IR (cm-1)** 2978 1609 1574 1458 1250 1203 1111 1076 1014 903 825 779 729 532; **High Resolution MS (EI)** calcd for C24H24N2O4 [M]+, 404.17; found, 404.17.

**6,6'-((1E,1'E)-((4-methyl-1,2-phenylene)bis(azanylylidene))bis(methanylylidene))bis(2-ethoxyphenol) (3b)**

Color: Red (78%, m.p.: 105-110 oC); **1H NMR** (400 MHz, CDCl3) δ 13.08 (d, *J* = 27.6 Hz, 2H), 8.53 (t, *J* = 6.0 Hz, 2H), 7.04 (q, *J* = 8.1 Hz, 2H), 6.96 – 6.87 (m, 5H), 6.80 – 6.71 (m, 2H), 4.06 (qd, *J* = 7.0, 3.2 Hz, 4H), 2.34 (s, 3H), 1.39 (qd, *J* = 7.0, 2.4 Hz, 6H); **13C NMR** (101 MHz, CDCl3) δ 164.30, 163.76, 152.10, 151.99, 147.75, 142.47, 139.90, 137.65, 128.07, 124.20, 124.12, 121.17, 120.18, 119.53, 119.47, 118.68, 118.40, 118.36, 117.16, 117.04, 64.88, 21.05, 14.90; **IR (cm-1)** 2977 1616 1462 1393 1250 1196 1119 1076 1011 903 829 798 775 729; **High Resolution MS (EI)** calcd for C25H26N2O4 [M]+, 418.19; found, 418.19.

**6,6'-((1E,1'E)-((4-fluoro-1,2-phenylene)bis(azanylylidene))bis(methanylylidene))bis(2-ethoxyphenol) (3c)**

Color: Spice Brown (58%, m.p.:85-90 oC); **1H NMR** (400 MHz, CDCl3) δ 12.84 (d, *J* = 98.2 Hz, 2H), 8.51 (s, 2H), 7.07 (s, 1H), 6.93 (s, 5H), 6.85 (dd, *J* = 9.2, 2.6 Hz, 1H), 6.80 (s, 2H), 4.05 (s, 4H), 1.38 (s, 6H); **13C NMR** (101 MHz, CDCl3) δ 165.16, 164.28, 151.95, 151.84 147.77, 147.74 124.34, 124.15, 121.48, 121.39, 119.35, 119.18, 118.69, 118.56, 117.43, 117.14, 114.06, 113.84, 107.71, 107.47, 64.85, 14.87; **IR (cm-1)** 2982 2881 1612 1462 1393 1335 1246 1180 1149 1119 1076 1014 972 906 837 810 771 725; **High Resolution MS (EI)** calcd for C24H23FN2O4 [M]+, 422.16; found, 422.16.

**3,4-bis((E)-(3-ethoxy-2-hydroxybenzylidene)amino)benzonitrile (3d)**

Color: Sandalwood ( 47%, m.p.:155-160 oC); **1H NMR** (400 MHz, CDCl3) δ 12.70 (s, 2H), 8.56 (s, 2H), 7.29 (dd, *J* = 8.3, 1.6 Hz, 2H), 7.24 (s, 1H), 6.99 (d, *J* = 2.7 Hz, 2H), 6.85 (t, *J* = 7.9 Hz, 2H), 6.68 (d, *J* = 8.3 Hz, 2H), 4.09 (q, *J* = 7.0 Hz, 4H), 1.44 (t, *J* = 7.0 Hz, 6H) ; **13C NMR** (101 MHz, CDCl3) δ 163.99 (s), 151.03 (s), 147.71 – 147.51, 144.92, 132.10, 124.14, 122.17, 119.55, 119.28, 116.81, 115.15, 64.69, 14.86; **IR (cm-1)** 3367 2214 1601 1512 1466 1257 1211 1138 1115 1076 891 822 783 737; **High Resolution MS** **(FAB)** calcd for C25H23N3O4 [M]+, 429.47; found, 429.17

**6,6'-((1E,1'E)-((4-nitro-1,2-phenylene)bis(azanylylidene))bis(methanylylidene))bis(2-ethoxyphenol) (3e**)

Color: Gold ( 23%, m.p.: 197-201 oC); **1H NMR**(400 MHz, CDCl3) δ 12.65 (s, 2H), 8.67 (s, 2H), 7.98 (d, *J* = 2.3 Hz, 1H), 7.02 (s, 2H), 6.98 (s, 2H), 6.87 (s, 2H), 6.69 (s, 2H), 4.08 (s, 4H), 1.45 (s, 6H); **13C NMR** (101 MHz, CDCl3) δ 164.34, 151.53 – 150.73, 147.73, 147.00, 133.79, 124.47, 124.21, 119.38, 119.15, 116.90, 114.54, 113.83, 64.68, 14.86; **IR (cm-1)** 3383 1601 1489 1462 1389 1308 1250 1184 1095 1011 980 953 899 822 783 733 656; **High Resolution MS (FAB)** calcd for C24H23N3O6 [M]+, 449.16; found, 449.16.

**6,6'-((1E,1'E)-((4,5-dimethyl-1,2-phenylene)bis(azanylylidene))bis(methanylylidene))bis(2-ethoxyphenol) (3f)**

Color: Brick Red (86%, m.p.:114-120 oC); **1H NMR** (400 MHz, CDCl3) δ 13.20 (s, 2H), 8.52 (s, 2H), 6.90 (dd, *J* = 10.2, 7.1 Hz, 6H), 6.75 (t, *J* = 7.9 Hz, 2H), 4.08 – 4.03 (m, 4H), 2.24 (s, 6H), 1.38 (t, *J* = 7.0 Hz, 6H); **13C NMR** (101 MHz, CDCl3) δ163.55, 151.96, 147.73, 139.99, 136.13, 124.23, 121.51, 119.54, 118.33, 117.01, 64.93, 19.45, 14.90; **IR (cm-1)** 2980 2869 1616 1462 1396 1242 1188 1115 1080 1011 910 872 833 775 721; **High Resolution MS (EI)** calcd for C26H28N2O4 [M]+, 432.20; found, 432.21.

**4,5-bis((E)-(3-ethoxy-2-hydroxybenzylidene)amino)phthalonitrile (3g)**

Color: Light Brick (28%, m.p.:186-190 oC); **1H NMR** (400 MHz, Acetone) δ 11.65 (s, 1H), 8.83 (s, 1H), 7.56 (s, 1H), 7.18 (s, 1H), 7.03 (d, *J* = 7.1 Hz, 1H), 6.80 (t, *J* = 7.9 Hz, 1H), 4.01 (q, *J* = 6.9 Hz, 2H), 1.28 (t, *J* = 6.9 Hz, 3H); **13C NMR** (101 MHz, Acetone) δ 166.13, 151.33, 147.65, 146.83, 138.27, 124.36, 123.99, 119.84, 119.00, 118.37, 117.77, 116.58, 116.06, 113.81 , 101.31, 64.50, 14.30; **IR (cm-1)** 3354 2230 1593 1551 1504 1462 1381 1338 1308 1250 1215 1184 1080 1018 906 779 729; **High Resolution MS (FAB)** calcd for C26H22N4O4[M]+, 454.16; found, 454.16.

**6,6'-((1E,1'E)-(ethane-1,2-diylbis(azanylylidene))bis(methanylylidene))bis(2-ethoxyphenol) (6)**

Color: Yellow (100%, m.p.:142-146 oC); **1H NMR** (400 MHz, CDCl3) δ 13.62 (s, 1H), 8.34 (s, 1H), 6.92 (dd, *J* = 7.9, 1.5 Hz, 1H), 6.86 (dd, *J* = 7.8, 1.5 Hz, 1H), 6.81 – 6.75 (m, 1H), 4.12 (q, *J* = 7.0 Hz, 2H), 3.97 (s, 2H), 1.49 (t, *J* = 7.0 Hz, 3H); **13C NMR** (101 MHz, CDCl3) δ 166.71, 151.67, 147.55, 123.24, 118.59, 118.05, 115.64, 64.52, 59.55, 14.88; **IR (cm-1)** 2986 2878 1632 1524 1458 1389 1335 1246 1173 1111 1076 1030 895 849 741; **High Resolution MS** **(EI)** calcd for C20H24N2O4 [M]+, 356.17; found, 356.17.

**6,6'-((1E,1'E)-((1S,2S)-cyclohexane-1,2-diylbis(azanylylidene))bis(methanylylidene))bis(2-ethoxyphenol) (7)**

Color: Corn (92%, m.p.: 75-80 oC); **1H NMR** (400 MHz, CDCl3) δ 13.82 (s, 2H), 8.15 (d, *J* = 4.4 Hz, 2H), 6.78 (dd, *J* = 7.9, 1.5 Hz, 2H), 6.70 (dd, *J* = 7.8, 1.6 Hz, 2H), 6.62 (dd, *J* = 10.0, 5.6 Hz, 2H), 3.99 (q, *J* = 7.0 Hz, 4H), 3.26 – 3.18 (m, 2H), 1.89 – 1.77 (m, 4H), 1.59 (ddd, *J* = 20.5, 12.1, 4.5 Hz, 4H), 1.39 (t, *J* = 4.5 Hz, 6H); **13C NMR**(101 MHz, CDCl3) δ 165.00 151.98 (m), 147.61, 123.22, 118.48, 117.85, 115.17, 72.78, 64.73, 33.02, 23.94, 15.26; **IR (cm-1)** 2974-2856 1628 1458 1246 1080 779 737; **High Resolution MS (EI)** calcd for C24H30N2O4 [M]+, 410.22; found, 410.22.

**II. Reaction monitoring using 1H NMR spectrometry**


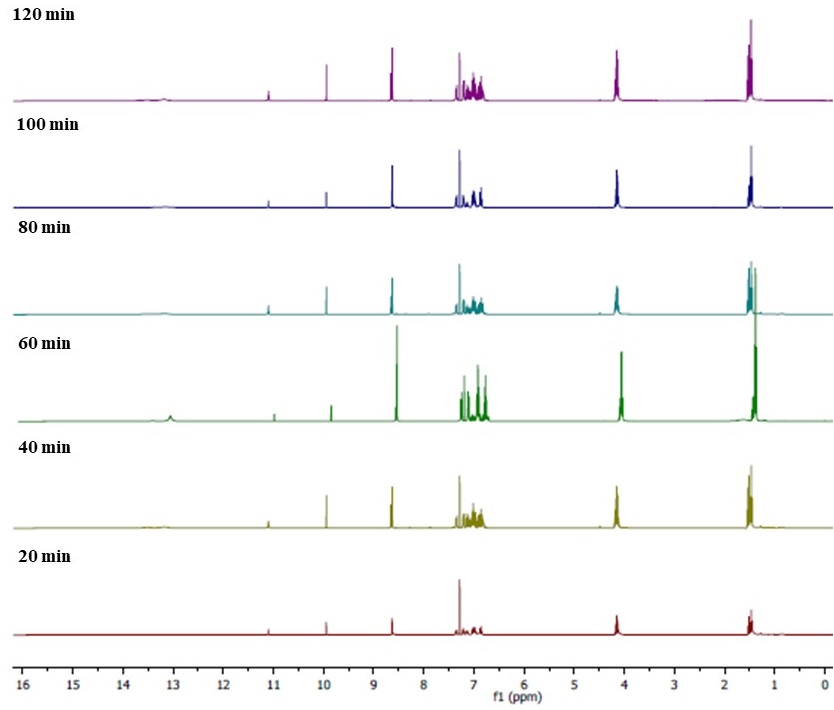


**Figure S1.** 1H NMR spectra of **3a** with different reaction time.


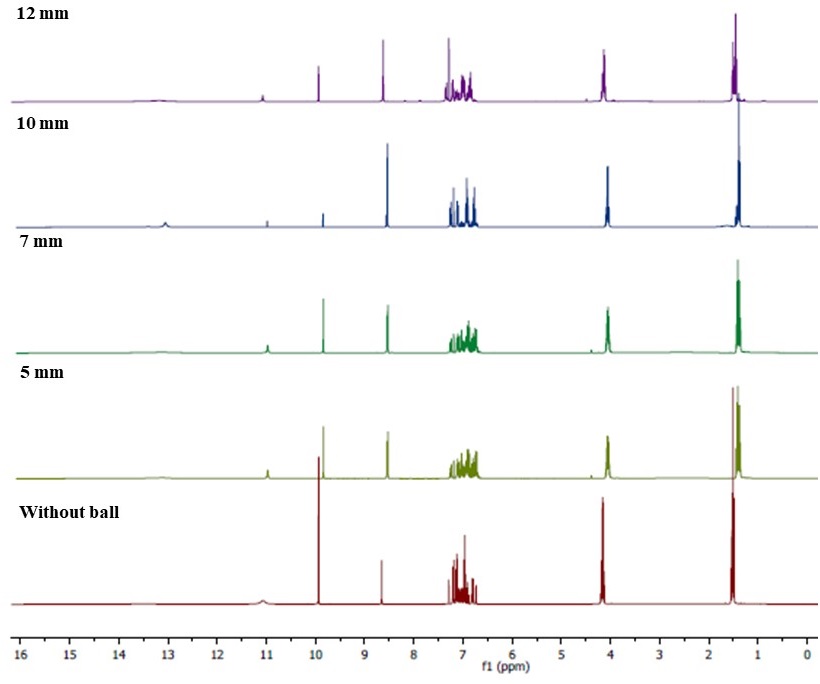


**Figure S2.** 1H NMR spectra of **3a** with different ball size.


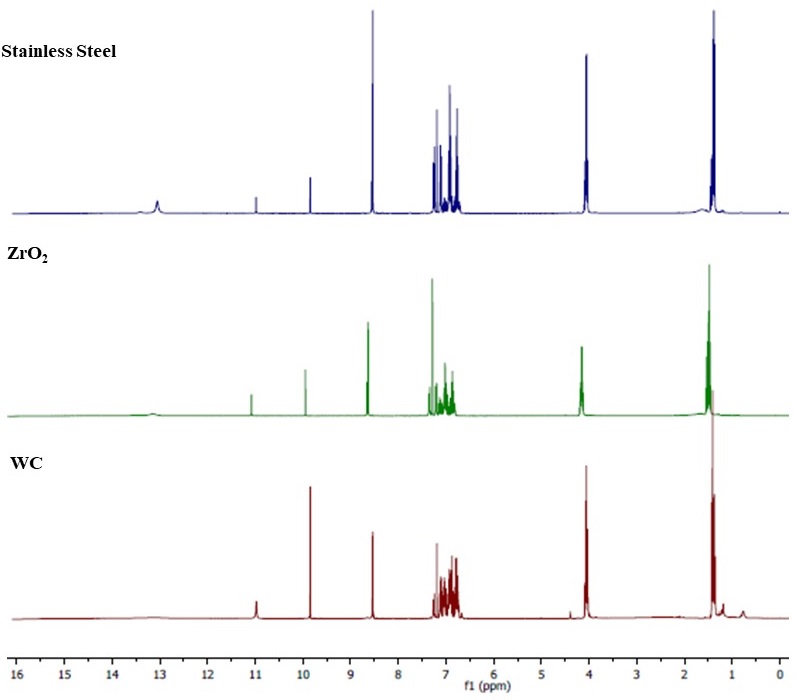


**Figure S3.** 1H NMR spectra of **3a** with different ball type.


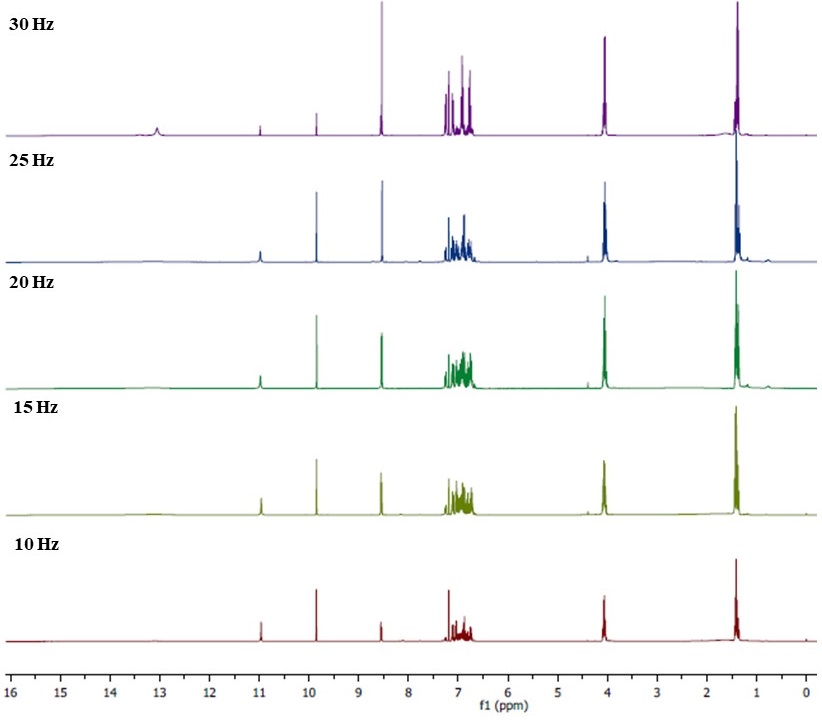


**Figure S4.** 1H NMR spectra of **3a** with different frequency.

**III. NMR solvent effect**


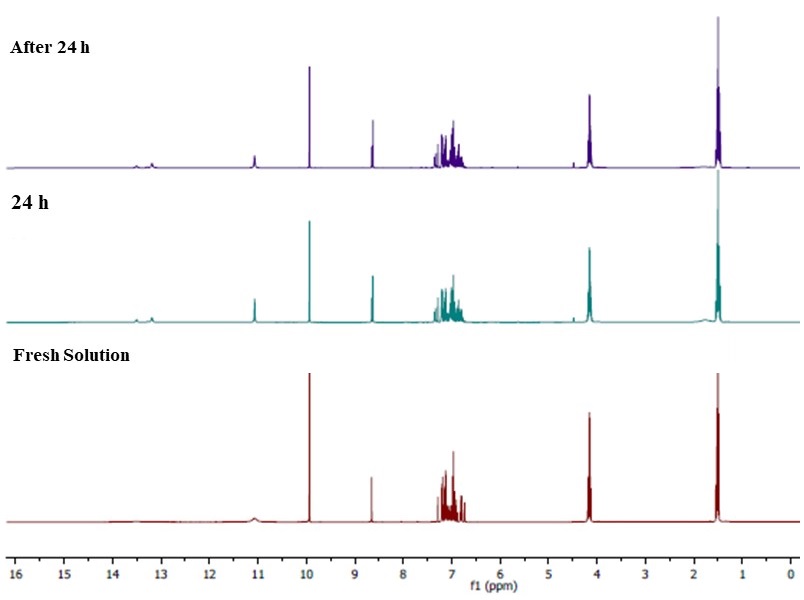


**Figure S5.** 1H NMR spectra of **3a** with different time in NMR solvent.

**IV. Appendix – Structure Characterization Data - 1H NMR, 13C NMR, FT-IR, and High-Resolution Mass of compounds obtained in this Study**


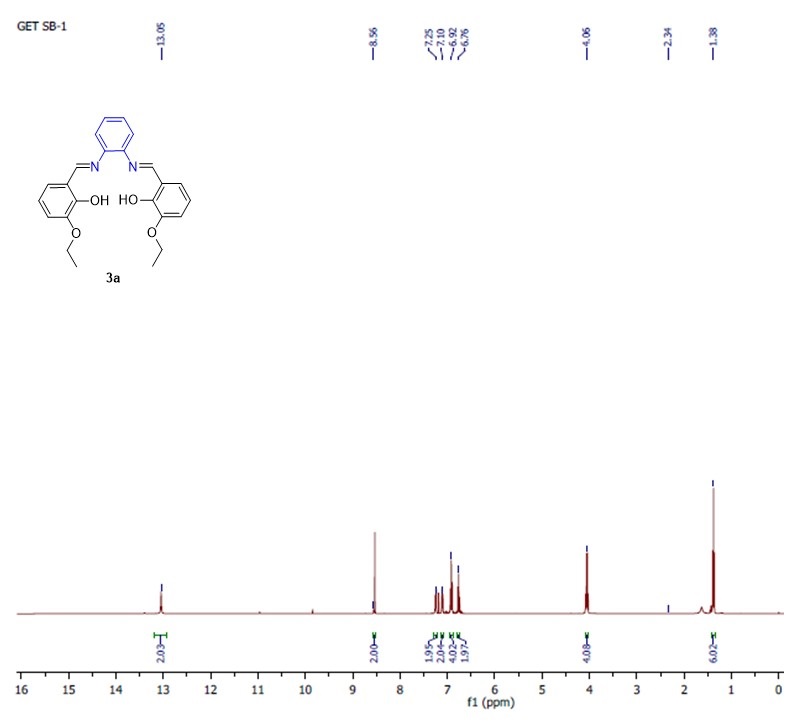


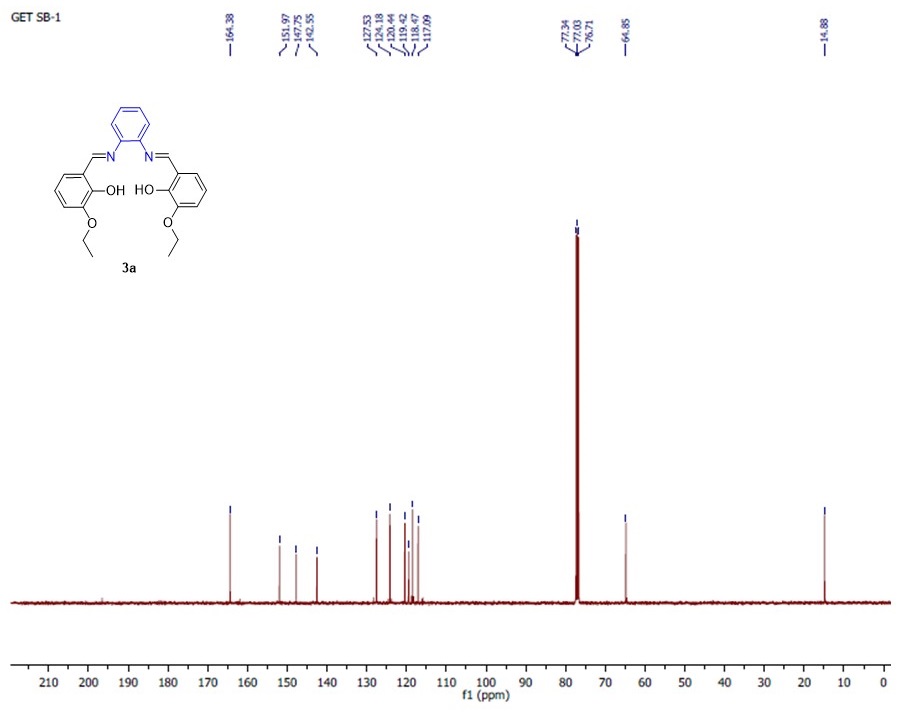

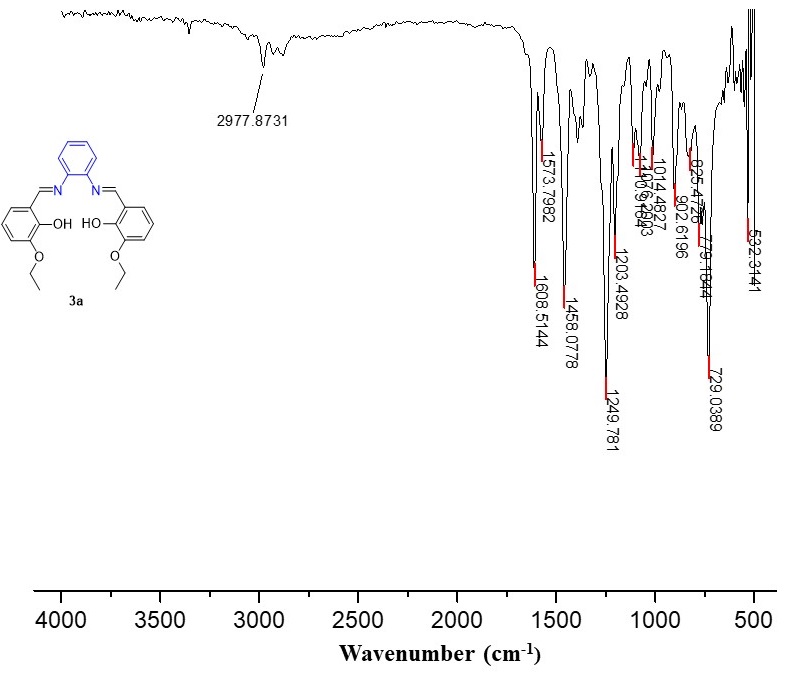

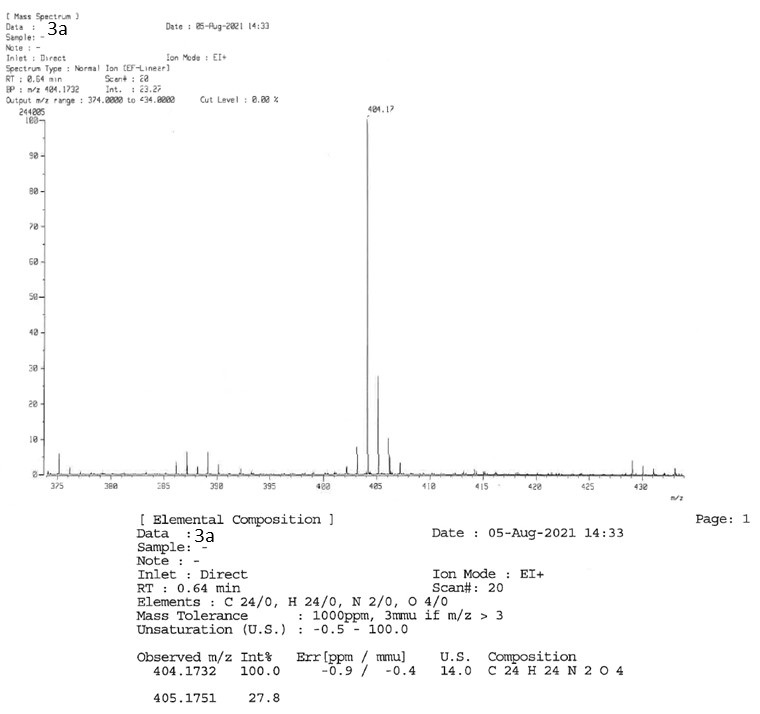


**Figure S6**. High-Resolution Mass data of **3a.**


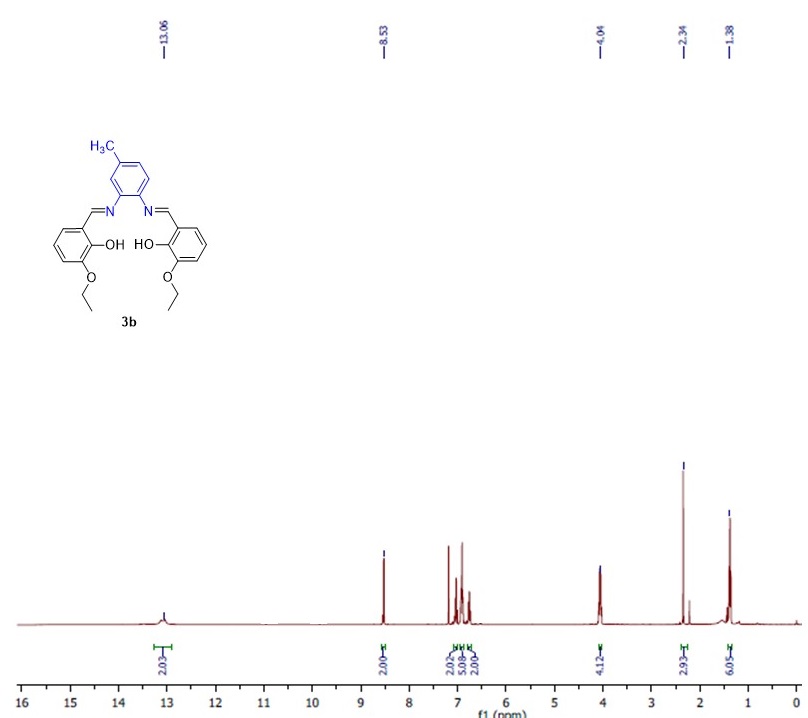

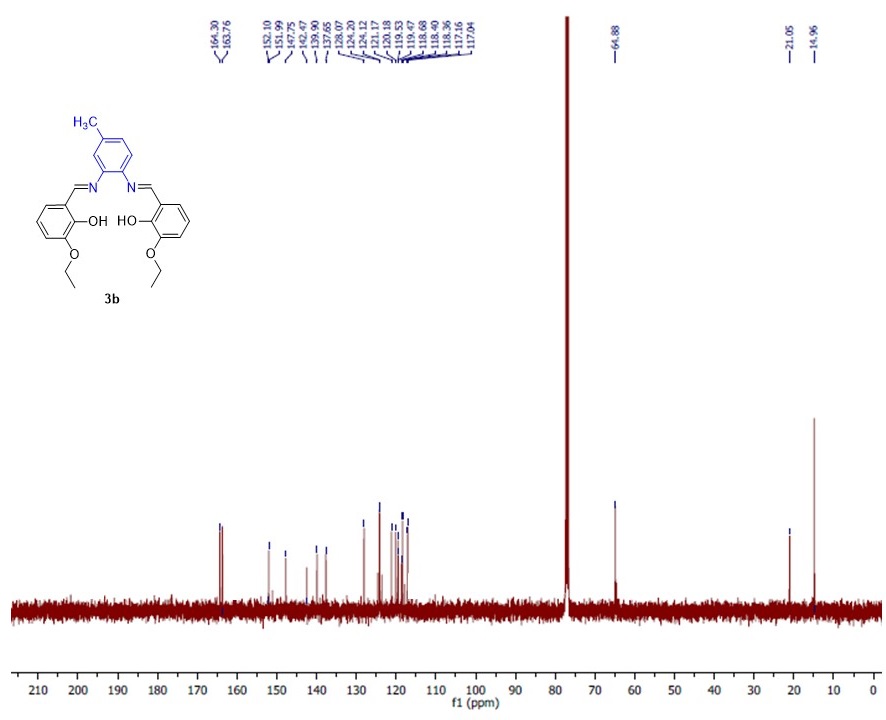

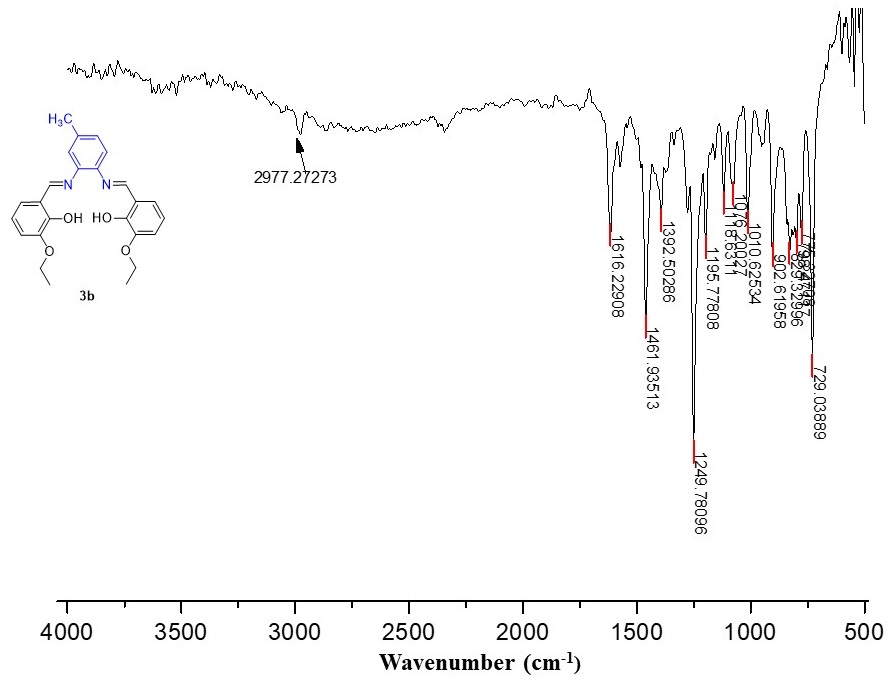

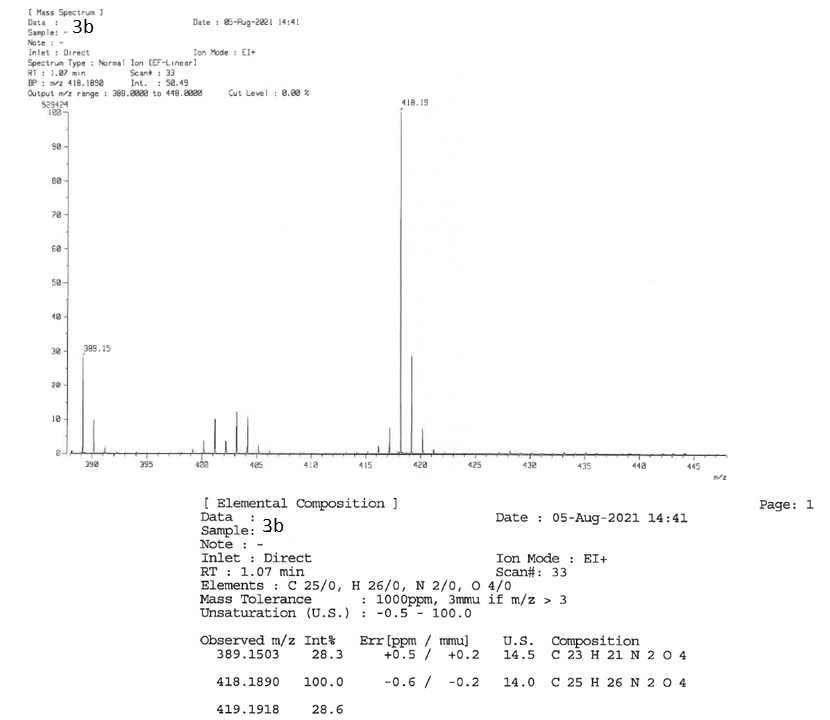


**Figure S7**. High-Resolution Mass data of **3b.**


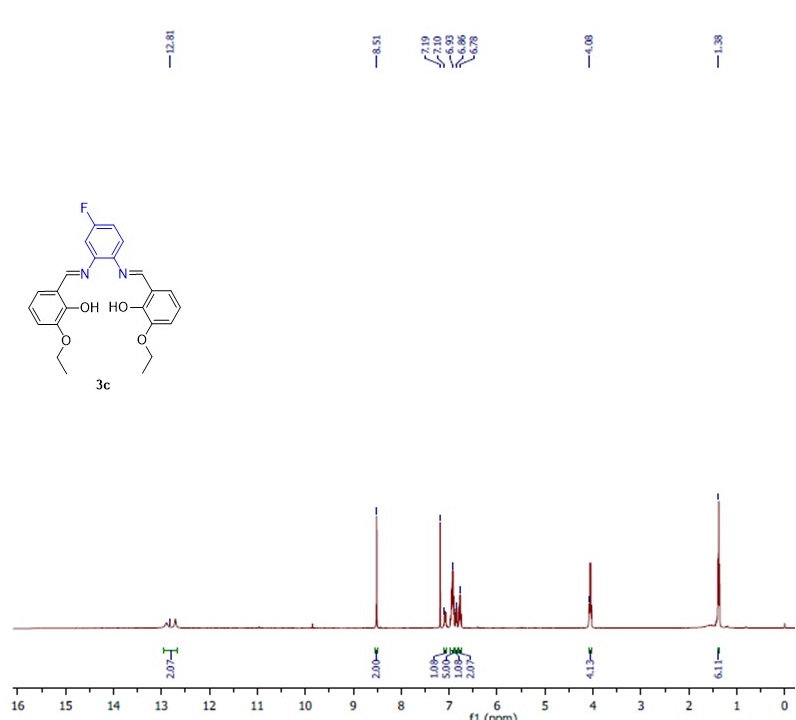


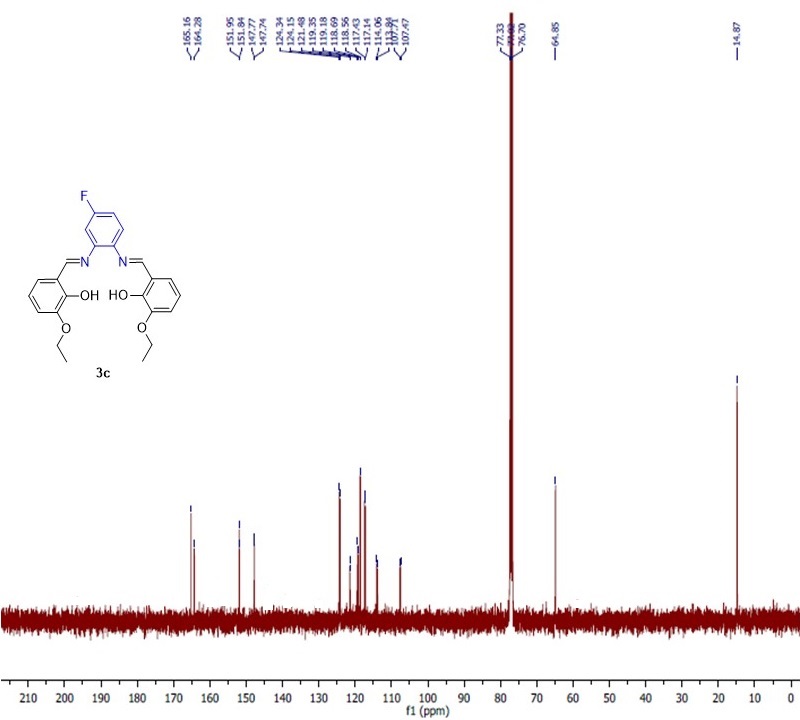

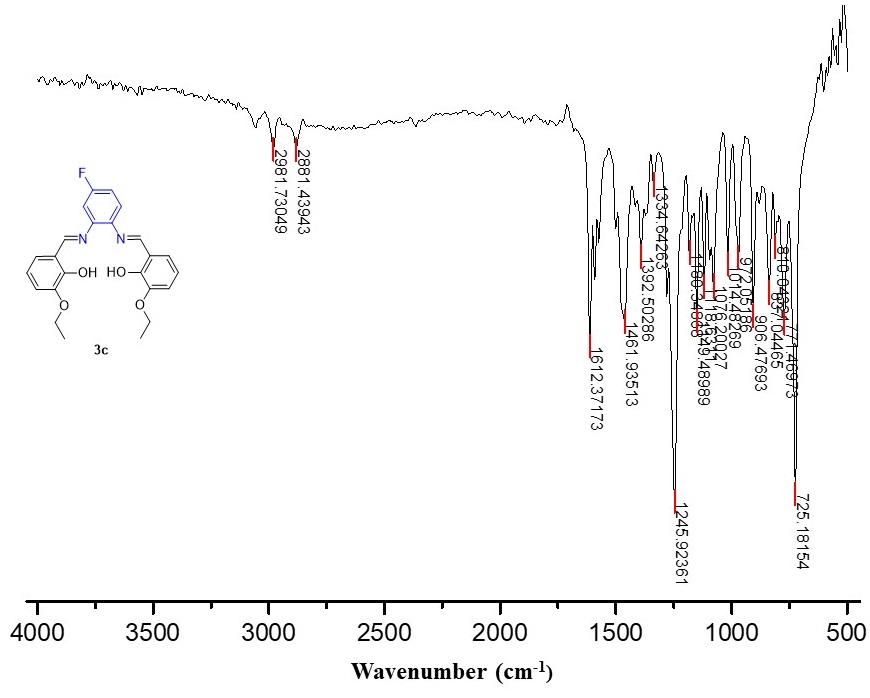

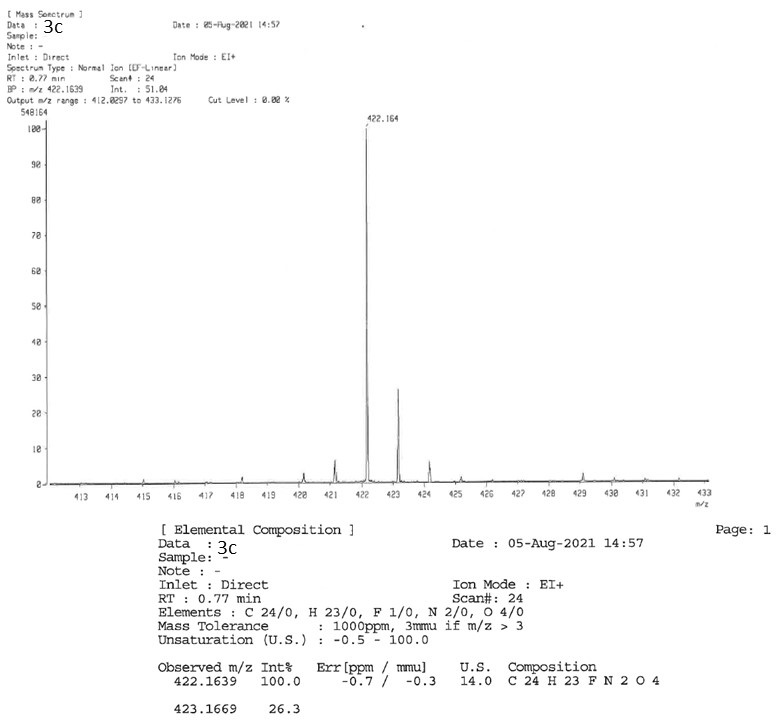


**Figure S8**. High-Resolution Mass data of **3c.**


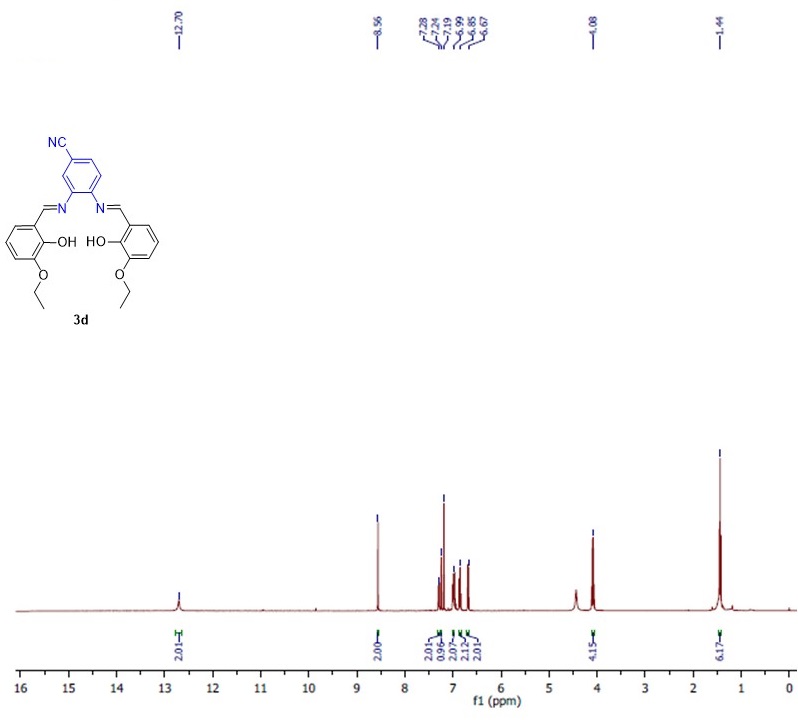

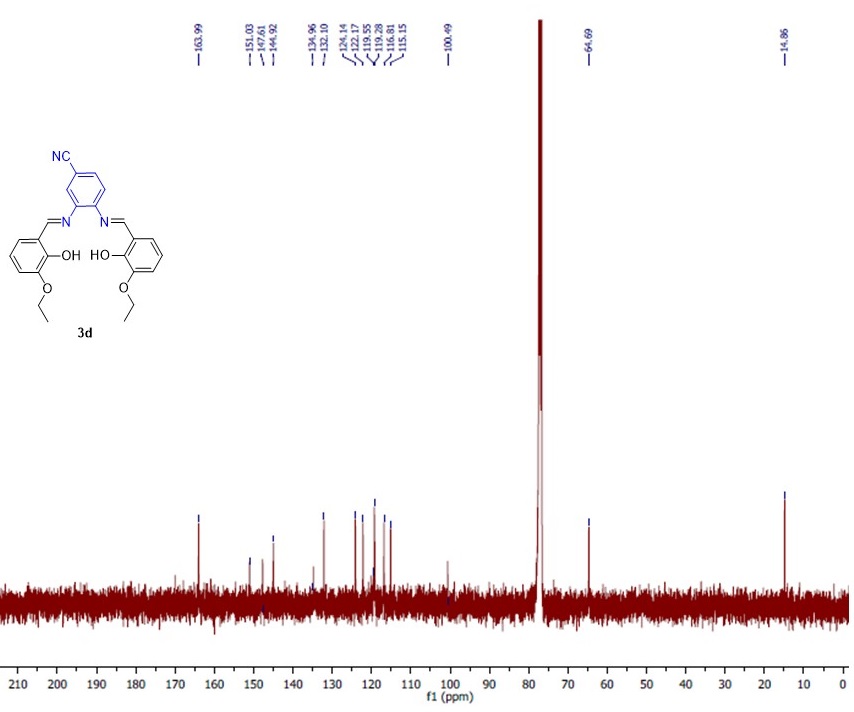

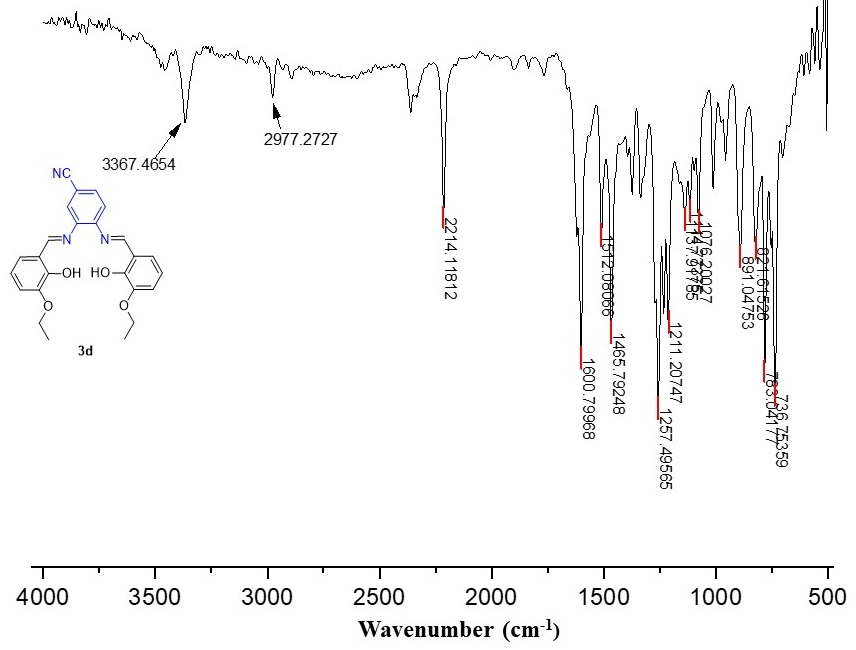

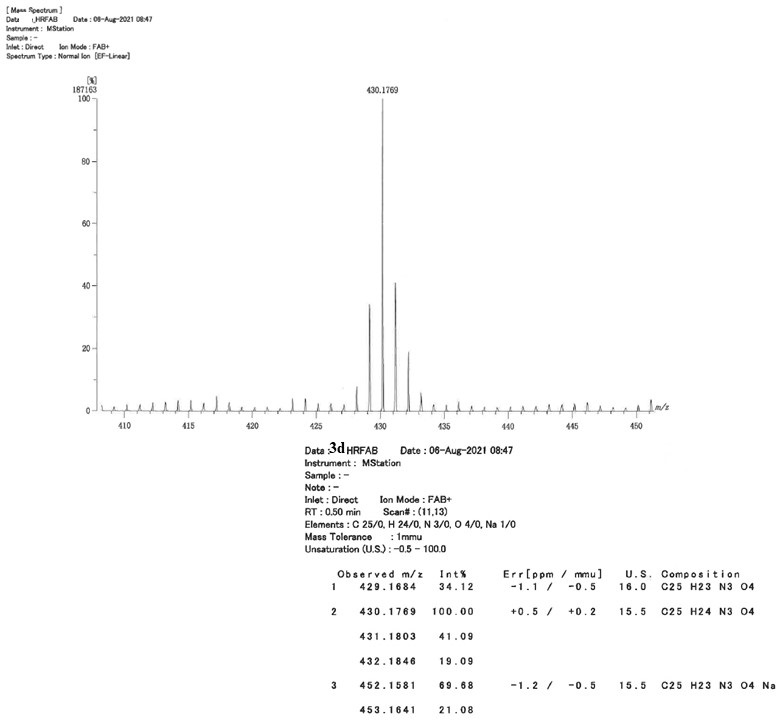


**Figure S9**. High-Resolution Mass data of **3d.**


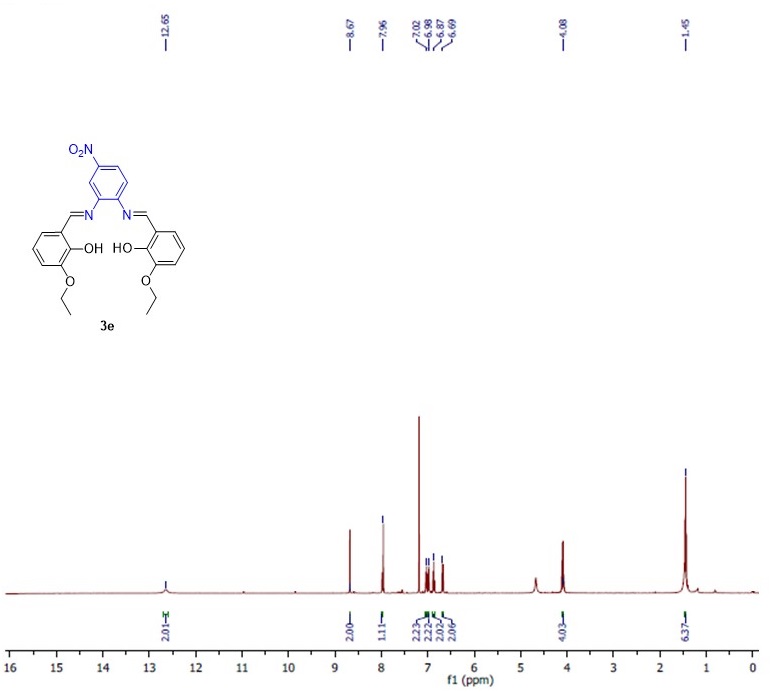


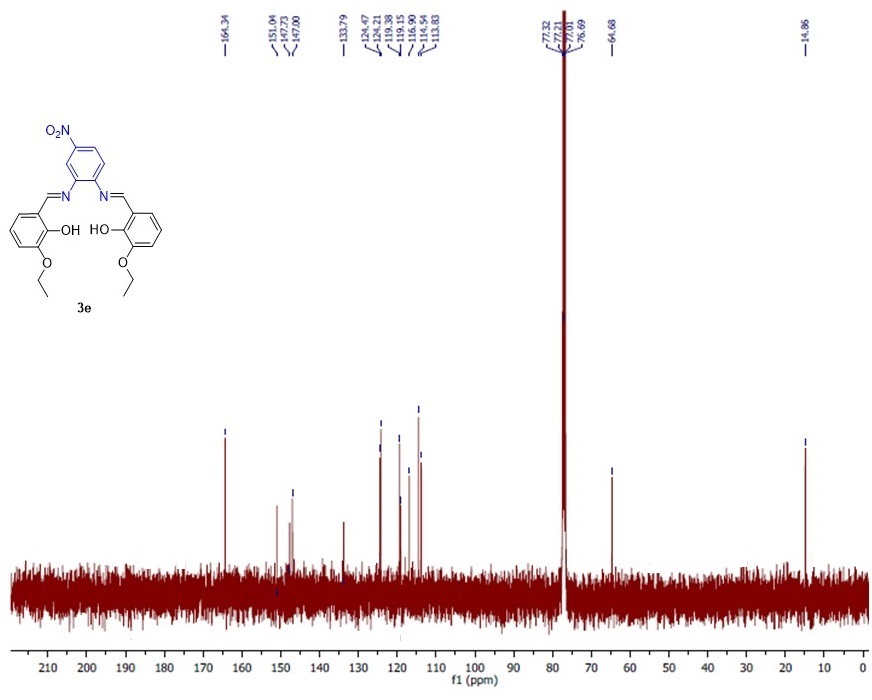


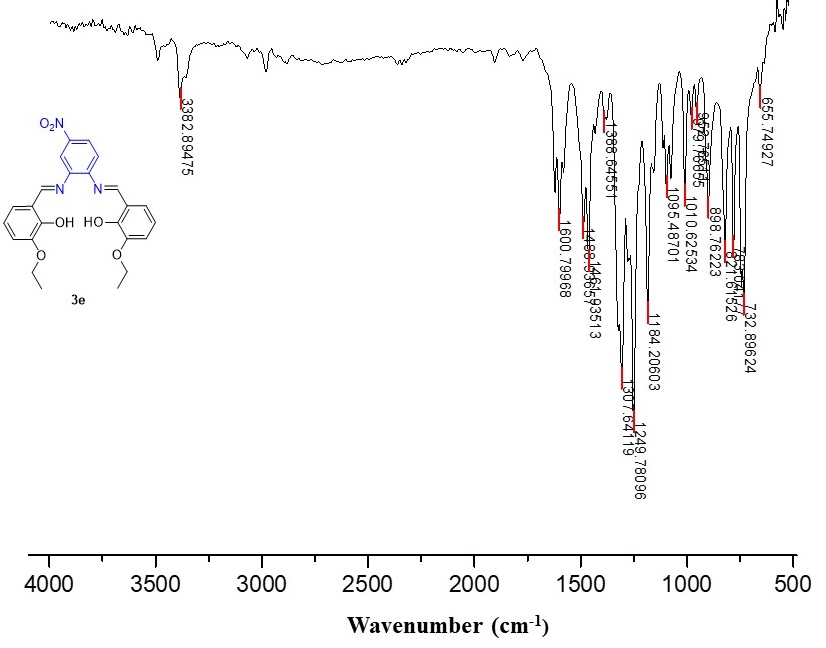

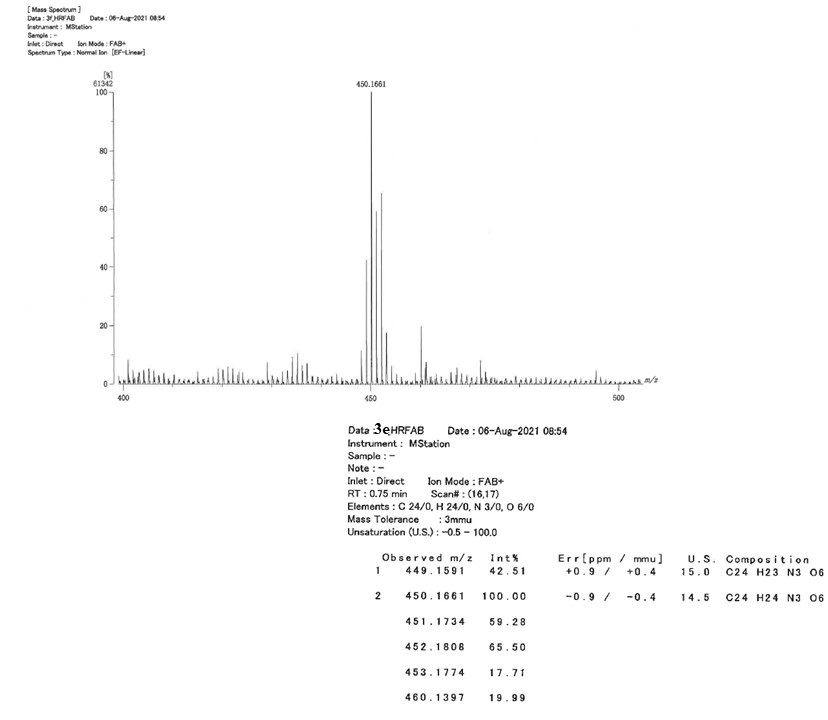


**Figure S10**. High-Resolution Mass data of **3e.**


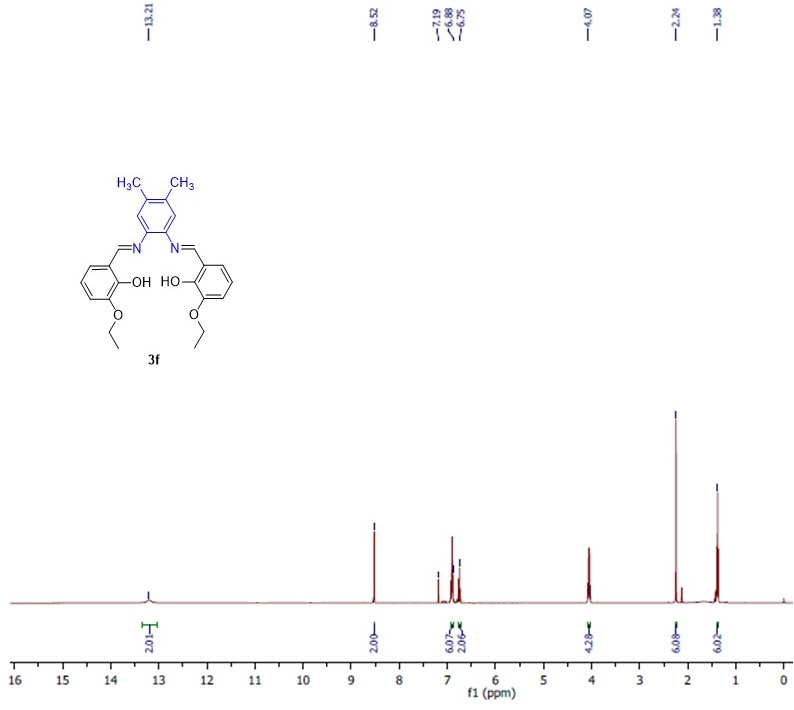


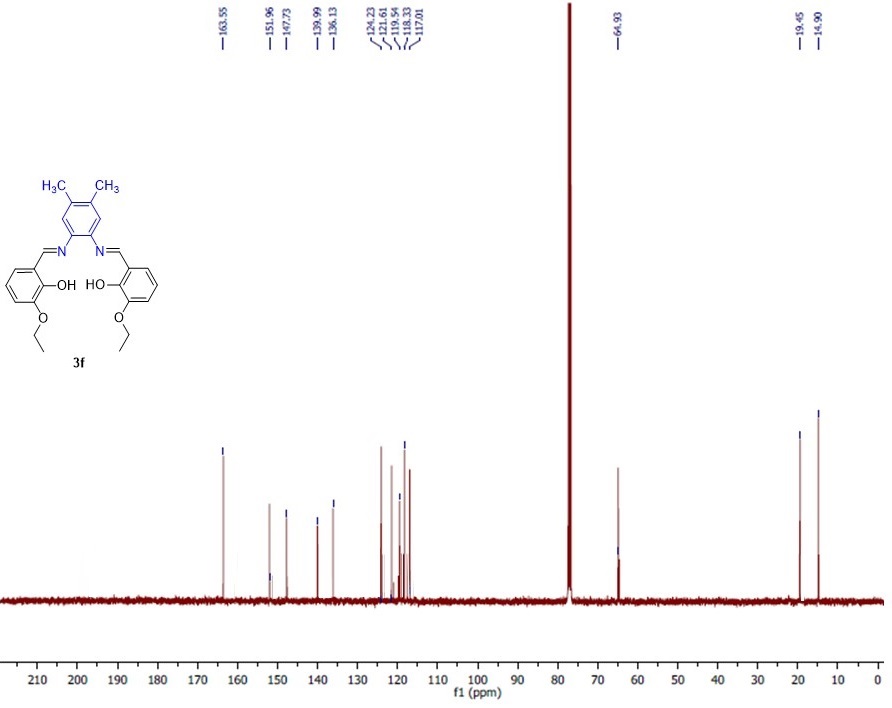


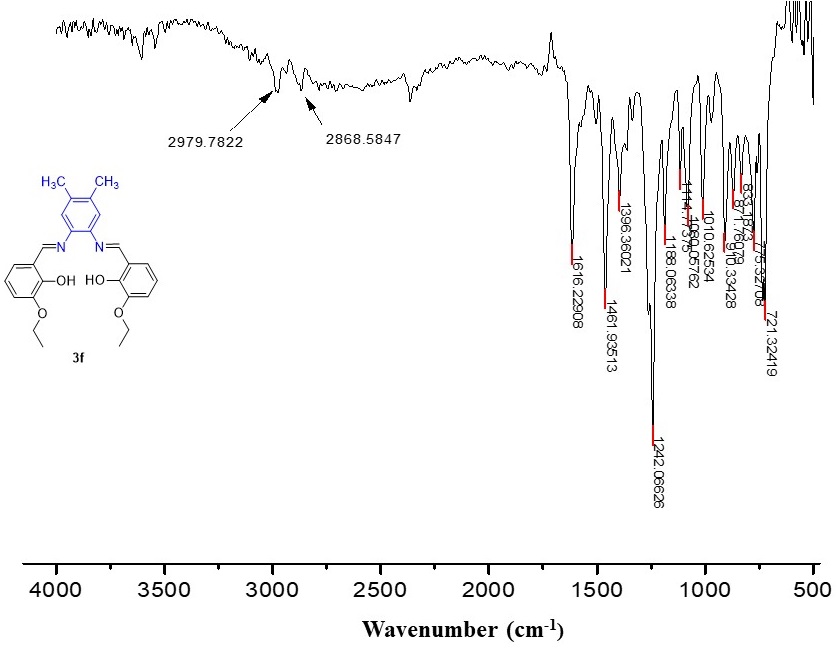

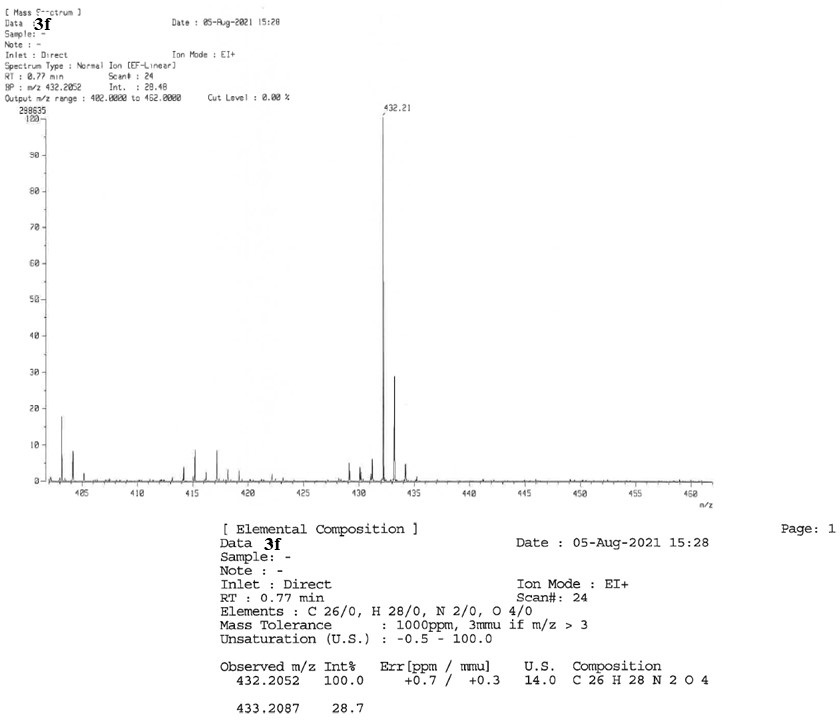


**Figure S11**. High-Resolution Mass data of **3f.**


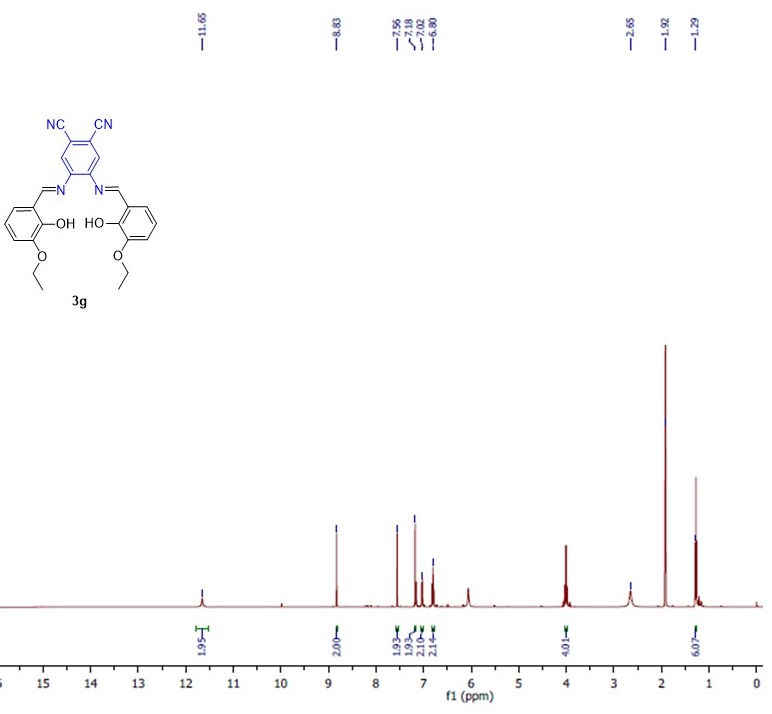

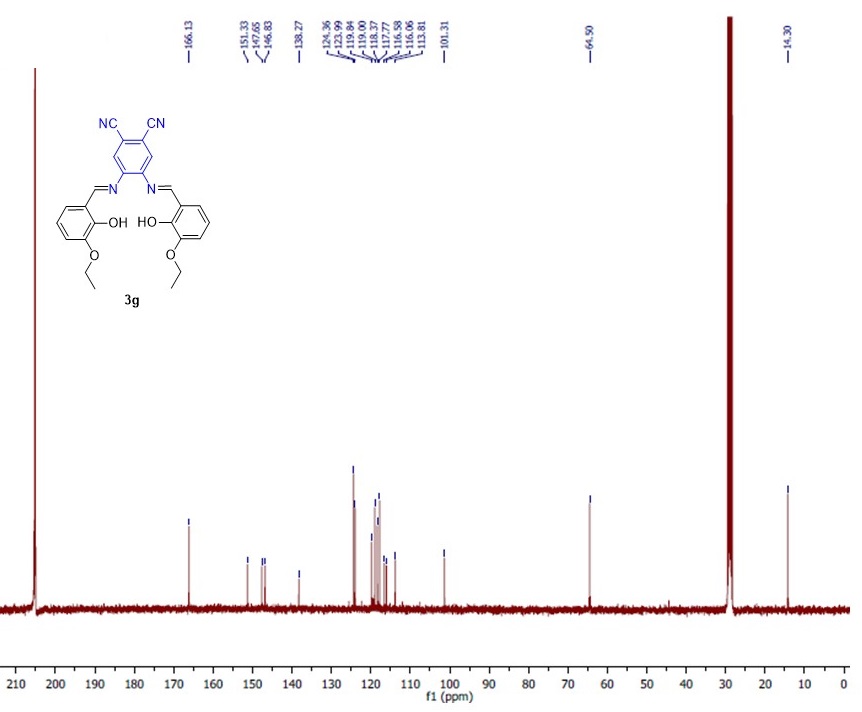

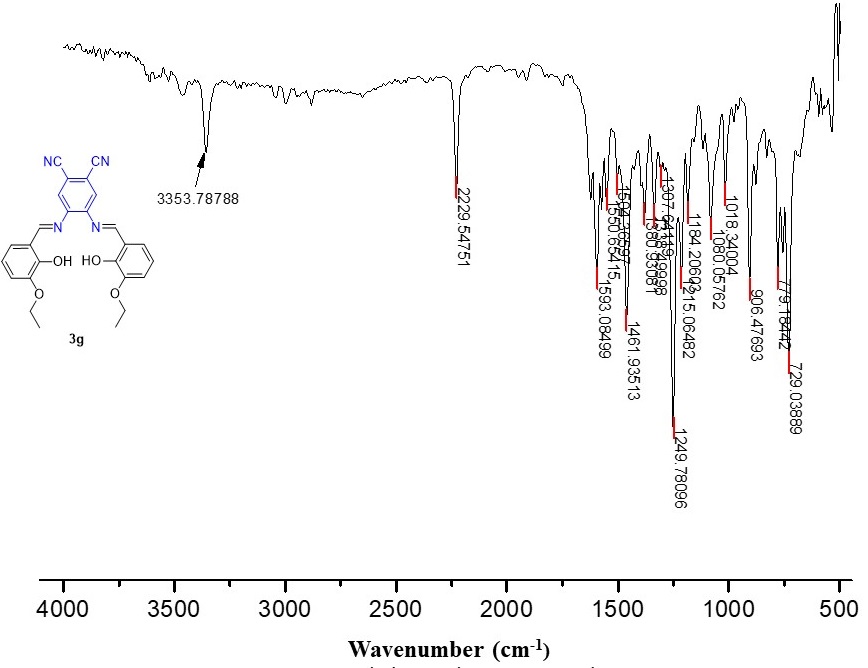

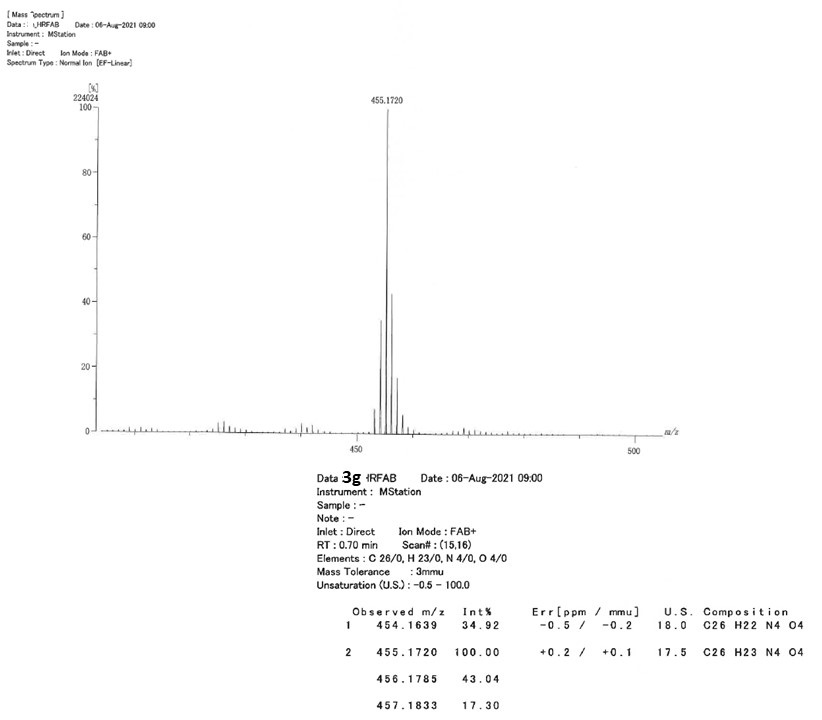


**Figure S12**. High-Resolution Mass data of **3g.**


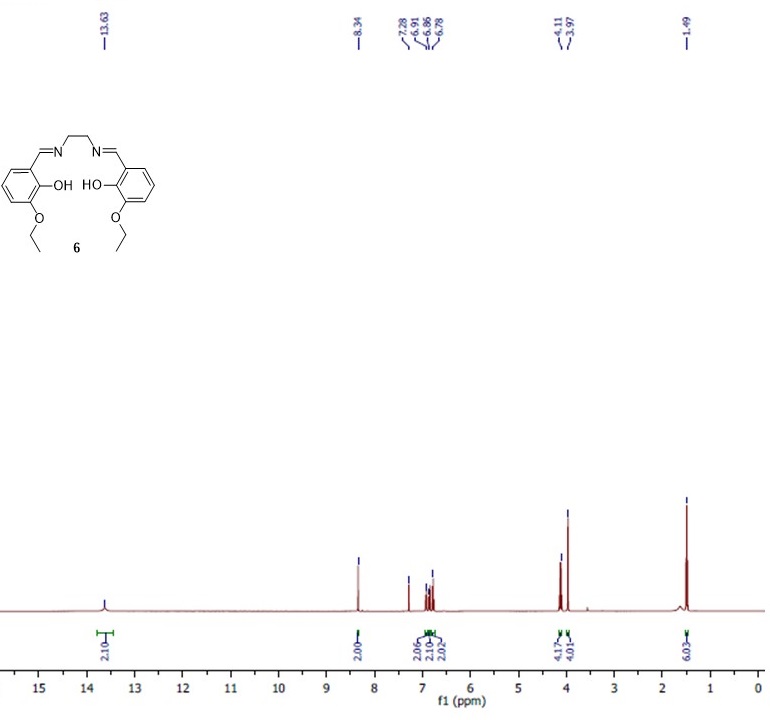

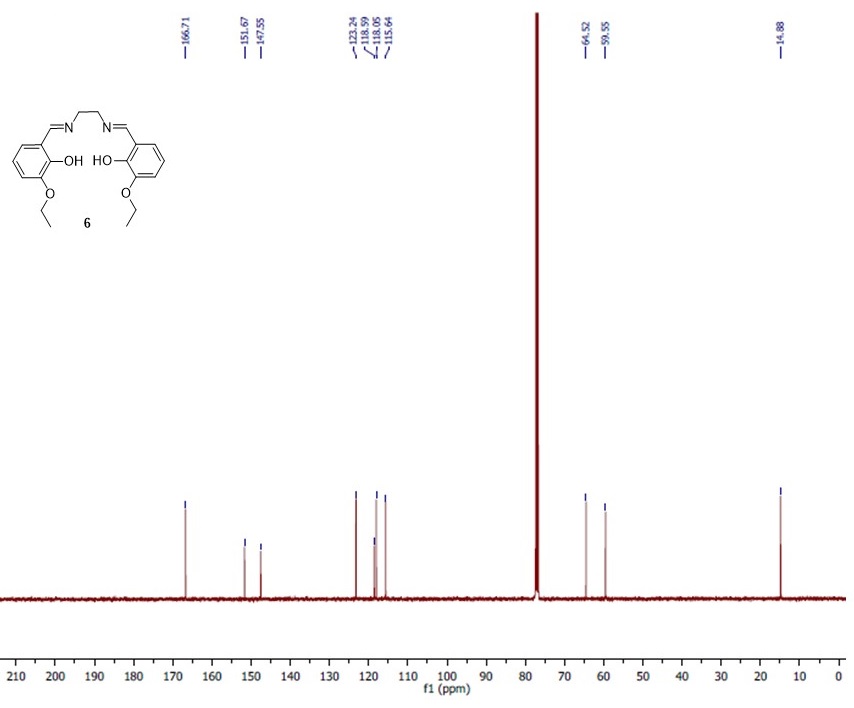

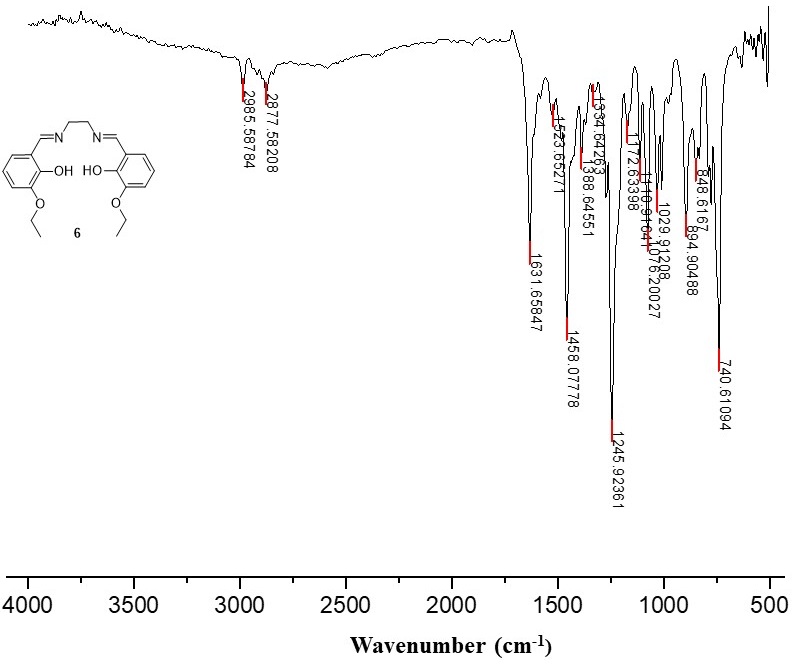

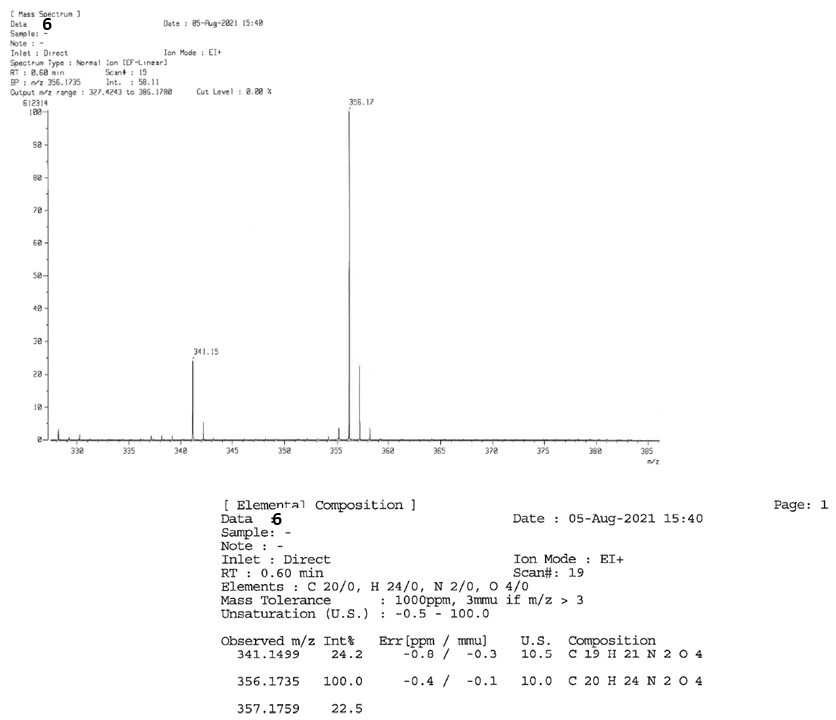


**Figure S13**. High-Resolution Mass data of **6.**


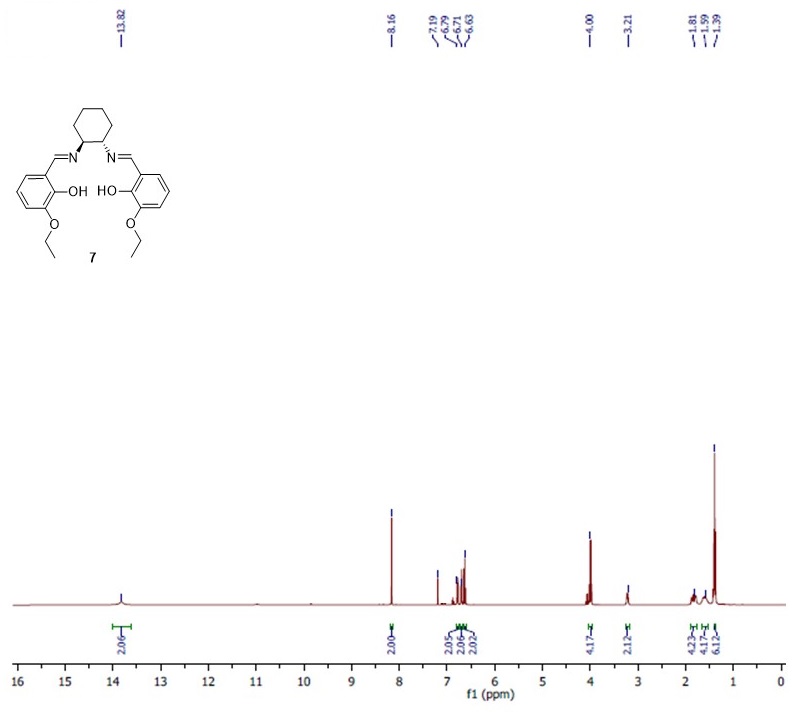

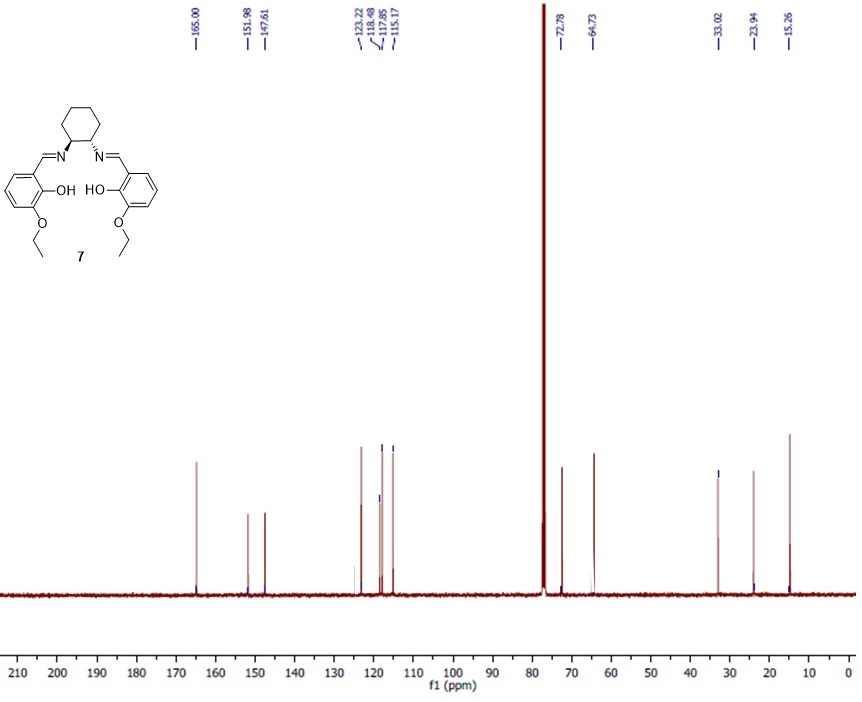

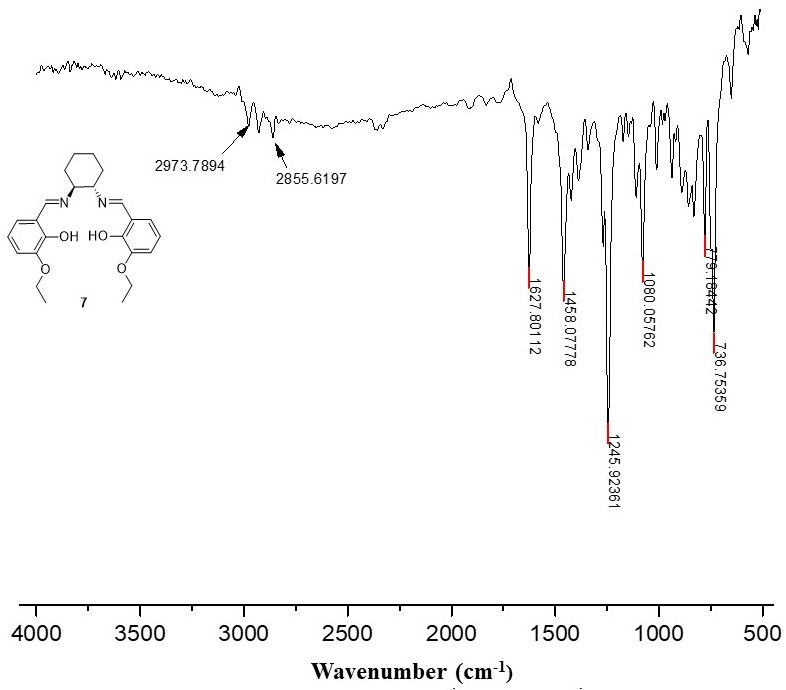

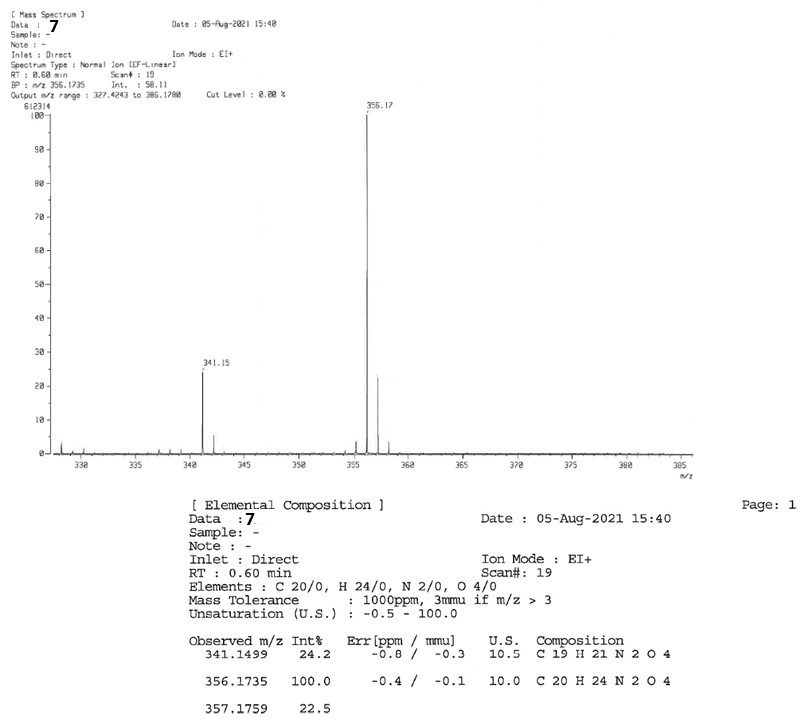


**Figure S14**. High-Resolution Mass data of **7.**
